# Supplementary material for: 3D structure and in situ arrangements of CatSper channel in the sperm flagellum
Source: PubMed Central journal article supplement (PMC9205950; doi:10.1038/s41467-022-31050-8), 2022-06-17

## Full scan blot images in Fig. 4c

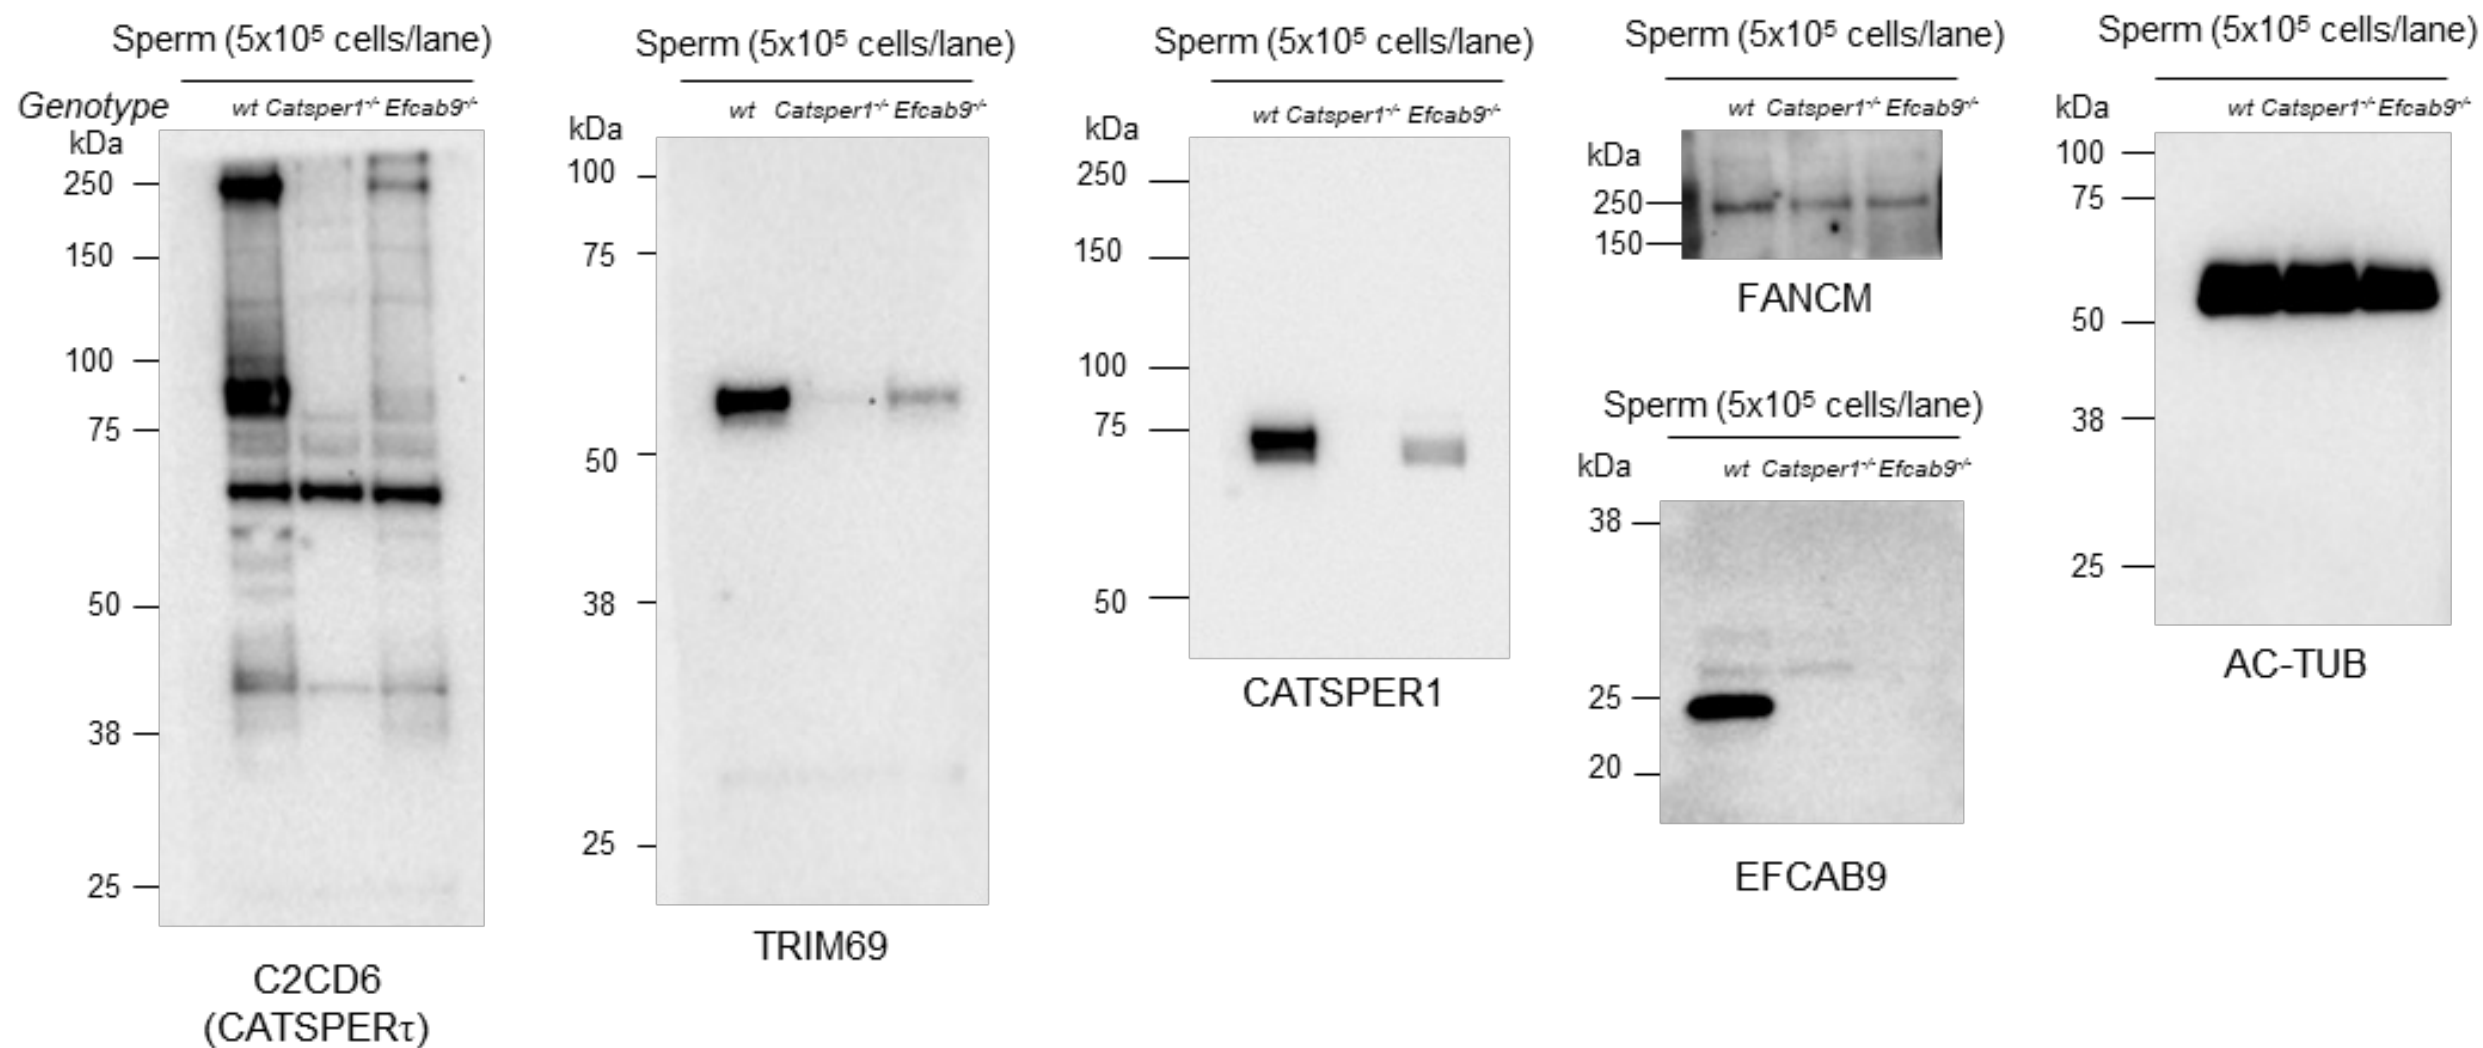

## Full scan blot images in Fig. 4f

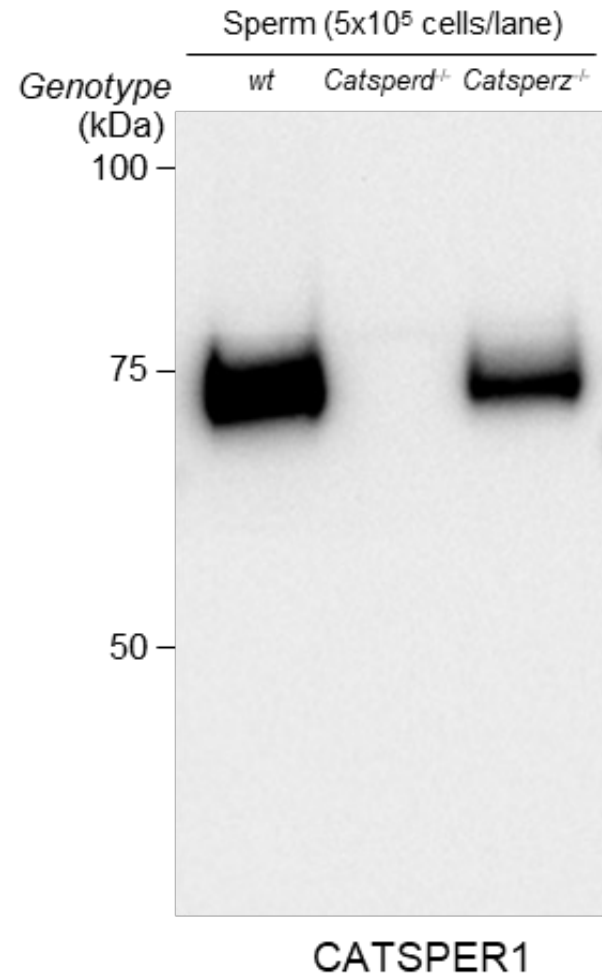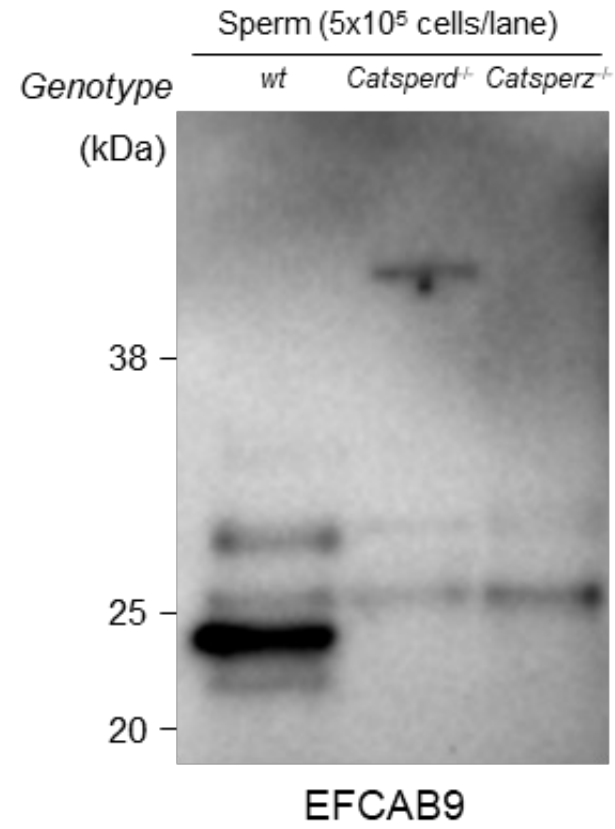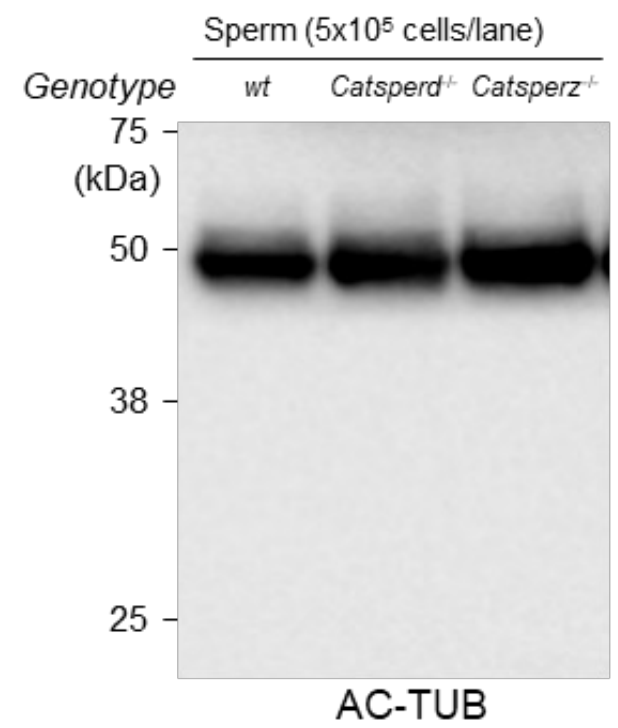

Supplement: 41467_2022_31050_MOESM10_ESM.pdf [file 41467_2022_31050_MOESM10_ESM.pdf]
